# Supplementary material for: Technical and conceptual considerations for using animated stimuli in studies of animal behavior
Source: PubMed Central journal article supplement — Curr Zool. 2016 Oct 23;63(1):5–19. doi: 10.1093/cz/zow104 (PMC5804155; doi:10.1093/cz/zow104), 2016-10-23
Supplement: zow104_supp.pdf [file zow104_supp.pdf]

Supplementary material

## **Technical and conceptual considerations for using animated stimuli in studies of animal behavior**

Laura Chouinard-Thuly<sup>1</sup>, Stefanie Gierszewski<sup>1</sup>, Gil G. Rosenthal, Simon M. Reader, Guillaume Rieucou, Kevin L. Woo, Robert Gerlai, Cynthia Tedore, Spencer J. Ingley, John Stowers, Joachim G. Frommen, Francine L. Dolins & Klaudia Witte

<sup>1</sup>Equal contribution.

**Table S1:** List of studies cited in the main text, as well as additional selected exemplar studies (to complement the use of study species) representing the use of computer animations and virtual reality since the early 1990s. For each study, information on the used method, the taxonomic study group, and the research topic are highlighted. For brevity, only the first author is given in the first column. Detailed references are provided at the end of the supplementary material. 2D = two-dimensional computer animation, 3D = three-dimensional computer animation, VR = virtual reality, M = mammals, B = birds, R = reptiles, A = amphibians, F = fish, I = insects, S = spiders. Different shades of grey are used to visually distinguish between ‘method’, ‘taxonomic study group’ and ‘research topic’.

| Reference                 | Method |    |    | Taxonomic study group |   |   |   |   |               | Research topic |                  |               |            |                        |
|---------------------------|--------|----|----|-----------------------|---|---|---|---|---------------|----------------|------------------|---------------|------------|------------------------|
|                           | 2D     | 3D | VR | Vertebrates           |   |   |   |   | Invertebrates |                | Sexual signaling | Group forming | Navigation | Perception/recognition |
|                           |        |    |    | M                     | B | R | A | F | I             | S              |                  |               |            |                        |
| Abaid, 2012               |        |    |    |                       |   |   |   |   |               |                |                  |               |            |                        |
| Amcoff, 2013              |        |    |    |                       |   |   |   |   |               |                |                  |               |            |                        |
| Baldauf, 2009, 2010, 2011 |        |    |    |                       |   |   |   |   |               |                |                  |               |            |                        |
| Butkowski, 2011           |        |    |    |                       |   |   |   |   |               |                |                  |               |            |                        |
| Campbell, 2009            |        |    |    |                       |   |   |   |   |               |                |                  |               |            |                        |
| Clark, 1999               |        |    |    |                       |   |   |   |   |               |                |                  |               |            |                        |
| Culumber, 2013            |        |    |    |                       |   |   |   |   |               |                |                  |               |            |                        |
| Dolins, 2014              |        |    |    |                       |   |   |   |   |               |                |                  |               |            |                        |
| Egger, 2011               |        |    |    |                       |   |   |   |   |               |                |                  |               |            |                        |
| Fischer, 2014             |        |    |    |                       |   |   |   |   |               |                |                  |               |            |                        |
| Fry, 2008                 |        |    |    |                       |   |   |   |   |               |                |                  |               |            |                        |
| Gerlai, 2009              |        |    |    |                       |   |   |   |   |               |                |                  |               |            |                        |
| Gray, 2002                |        |    |    |                       |   |   |   |   |               |                |                  |               |            |                        |
| Harland, 2002             |        |    |    |                       |   |   |   |   |               |                |                  |               |            |                        |
| Hess, 2016                |        |    |    |                       |   |   |   |   |               |                |                  |               |            |                        |
| Hiermes, 2016             |        |    |    |                       |   |   |   |   |               |                |                  |               |            |                        |
| Hölscher, 2005            |        |    |    |                       |   |   |   |   |               |                |                  |               |            |                        |
| Ioannou, 2012             |        |    |    |                       |   |   |   |   |               |                |                  |               |            |                        |
| Künzler, 1998             |        |    |    |                       |   |   |   |   |               |                |                  |               |            |                        |
| Levy, 2014                |        |    |    |                       |   |   |   |   |               |                |                  |               |            |                        |
| Makowicz, 2010            |        |    |    |                       |   |   |   |   |               |                |                  |               |            |                        |

|                  |           |           |          |          |          |          |          |           |          |          |           |          |          |           |
|------------------|-----------|-----------|----------|----------|----------|----------|----------|-----------|----------|----------|-----------|----------|----------|-----------|
| Mazzi, 2003      |           |           |          |          |          |          |          |           |          |          |           |          |          |           |
| McKinnon, 1996   |           |           |          |          |          |          |          |           |          |          |           |          |          |           |
| Mehlis, 2008     |           |           |          |          |          |          |          |           |          |          |           |          |          |           |
| Moffat, 1998     |           |           |          |          |          |          |          |           |          |          |           |          |          |           |
| Morris, 2003     |           |           |          |          |          |          |          |           |          |          |           |          |          |           |
| Nakayasu, 2014   |           |           |          |          |          |          |          |           |          |          |           |          |          |           |
| Neave, 2011      |           |           |          |          |          |          |          |           |          |          |           |          |          |           |
| Nelson, 2006     |           |           |          |          |          |          |          |           |          |          |           |          |          |           |
| Nelson, 2010     |           |           |          |          |          |          |          |           |          |          |           |          |          |           |
| Ord, 2002        |           |           |          |          |          |          |          |           |          |          |           |          |          |           |
| Parr, 2008       |           |           |          |          |          |          |          |           |          |          |           |          |          |           |
| Pather, 2009     |           |           |          |          |          |          |          |           |          |          |           |          |          |           |
| Peckmezian, 2015 |           |           |          |          |          |          |          |           |          |          |           |          |          |           |
| Peters, 2007     |           |           |          |          |          |          |          |           |          |          |           |          |          |           |
| Qin, 2014        |           |           |          |          |          |          |          |           |          |          |           |          |          |           |
| Reichert, 2014   |           |           |          |          |          |          |          |           |          |          |           |          |          |           |
| Robinson, 2010   |           |           |          |          |          |          |          |           |          |          |           |          |          |           |
| Rosenthal, 1998  |           |           |          |          |          |          |          |           |          |          |           |          |          |           |
| Rosenthal, 2004  |           |           |          |          |          |          |          |           |          |          |           |          |          |           |
| Rosenthal, 2005  |           |           |          |          |          |          |          |           |          |          |           |          |          |           |
| Roster, 1995     |           |           |          |          |          |          |          |           |          |          |           |          |          |           |
| Tedore, 2013     |           |           |          |          |          |          |          |           |          |          |           |          |          |           |
| Tedore, 2015     |           |           |          |          |          |          |          |           |          |          |           |          |          |           |
| Thurley, 2014    |           |           |          |          |          |          |          |           |          |          |           |          |          |           |
| Thünken, 2014    |           |           |          |          |          |          |          |           |          |          |           |          |          |           |
| Van Dyk, 2008    |           |           |          |          |          |          |          |           |          |          |           |          |          |           |
| Watanabe, 2006   |           |           |          |          |          |          |          |           |          |          |           |          |          |           |
| Wong, 2006       |           |           |          |          |          |          |          |           |          |          |           |          |          |           |
| Woo, 2012, 2015  |           |           |          |          |          |          |          |           |          |          |           |          |          |           |
| Zbinden, 2004    |           |           |          |          |          |          |          |           |          |          |           |          |          |           |
| <b>Total</b>     | <b>21</b> | <b>24</b> | <b>7</b> | <b>7</b> | <b>1</b> | <b>5</b> | <b>3</b> | <b>28</b> | <b>2</b> | <b>5</b> | <b>22</b> | <b>6</b> | <b>4</b> | <b>23</b> |

**Table S2:** List of selected programs (current as of 16 March 2016) for creating and presenting 2D and 3D stimuli as well as VR. Free software is given in italics.

| Software                                                                       | Website                                                             | Brief description                                                                                                                                                                                                                                                                                                                                              |
|--------------------------------------------------------------------------------|---------------------------------------------------------------------|----------------------------------------------------------------------------------------------------------------------------------------------------------------------------------------------------------------------------------------------------------------------------------------------------------------------------------------------------------------|
| <b>Design and animation of 2D stimuli</b>                                      |                                                                     |                                                                                                                                                                                                                                                                                                                                                                |
| Adobe Photoshop <sup>1,2</sup>                                                 | <a href="http://www.adobe.com/">http://www.adobe.com/</a>           | State-of-the-art raster graphics editing program for print and web; elaborate layer processing; support for many file formats including RAW; <i>30-day free trial version</i>                                                                                                                                                                                  |
| Adobe After Effects <sup>1</sup> or<br>Adobe Animate (formerly<br>Adobe Flash) | <a href="http://www.adobe.com/">http://www.adobe.com/</a>           | Animation program for 2D .psd image files prior modified with Adobe Photoshop; video compositing in After Effects; <i>30-day free trial version</i>                                                                                                                                                                                                            |
| <i>GIMP with GIMP<br/>Animation Package<sup>2</sup></i>                        | <a href="http://www.gimp.org/">http://www.gimp.org/</a>             | 2D raster and vector graphics editing program; <i>GIMP animation package</i> is a plugin that enables animation of images as a sequence of single frames; video editing (frame by frame); offers many of the same features as Adobe Photoshop with lower memory requirements; working with different layers possible; supports many file formats including RAW |
| MS PowerPoint <sup>3</sup>                                                     | <a href="https://www.microsoft.com/">https://www.microsoft.com/</a> | Presentation program with limited 2D raster and vector graphics editing and                                                                                                                                                                                                                                                                                    |

|                                                                                        |                                                                                     |                                                                                                                                                                                                                                                                                                      |
|----------------------------------------------------------------------------------------|-------------------------------------------------------------------------------------|------------------------------------------------------------------------------------------------------------------------------------------------------------------------------------------------------------------------------------------------------------------------------------------------------|
|                                                                                        |                                                                                     | animation capabilities                                                                                                                                                                                                                                                                               |
| <i>Pencil2D</i> <sup>4</sup>                                                           | <a href="http://www.pencil2d.org">http://www.pencil2d.org</a>                       | Realistic sketching program suited also for 2D animation; allows both creation and animation of raster and vector graphics based on keyframing timeline; alternative to Adobe Flash                                                                                                                  |
| <b>Design and animation of 3D stimuli</b> (generally also applicable for 2D animation) |                                                                                     |                                                                                                                                                                                                                                                                                                      |
| 3D Studio Max                                                                          | <a href="http://www.autodesk.com/">http://www.autodesk.com/</a>                     | Most commonly used professional 3D modelling tool to design, visualize, and animate 3D objects and environments; animation by keyframing; more user-friendly interface than Maya; available for Windows only; <i>free 30-day trial version</i>                                                       |
| <i>anyFish 2.0</i> <sup>5</sup>                                                        | <a href="http://swordtail.tamu.edu/anyfish/">http://swordtail.tamu.edu/anyfish/</a> | Generate, animate (keyframing), and share 3D fish models, for fish biologists; currently supports models for sticklebacks and poeciliid fishes                                                                                                                                                       |
| <i>Blender</i> <sup>6,7</sup>                                                          | <a href="https://www.blender.org/">https://www.blender.org/</a>                     | Design of 3D objects and environments; free alternative to Maya; offers most tools that available elsewhere; keyframing animation; supports Python scripts; game engine included (see below); open-source                                                                                            |
| LightWave 3D <sup>8</sup>                                                              | <a href="https://www.lightwave3d.com/">https://www.lightwave3d.com/</a>             | Professional modelling and animation tool; supports Python scripts; LightWave's flocking system for simulating coordinated animal motion; needs less resources and memory compared to 3D Studio Max; <i>free 30-day trial version</i> and reduced educational version for students and faculty staff |

|                                               |                                                                                 |                                                                                                                                                                                                                          |
|-----------------------------------------------|---------------------------------------------------------------------------------|--------------------------------------------------------------------------------------------------------------------------------------------------------------------------------------------------------------------------|
| Maya                                          | <a href="http://www.autodesk.com/">http://www.autodesk.com/</a>                 | Professional software for 3D modelling, rendering and animation of objects and environments; animation by keyframing; supports Python scripts; <i>free 30-day trial version; 3 years free for students</i>               |
| <i>Unity 3D Personal Edition</i> <sup>9</sup> | <a href="http://unity3d.com/">http://unity3d.com/</a>                           | Design of 3D objects and environments; game engine included (see below)                                                                                                                                                  |
| <b>Game engine</b>                            |                                                                                 |                                                                                                                                                                                                                          |
| <i>Blender game engine</i> <sup>6</sup>       | <a href="https://www.blender.org/">https://www.blender.org/</a>                 | 2D/3D game engine written in the programming languages C, C++ and Python; included in <i>Blender</i> main software (see above); supports real-time rendering and external input devices                                  |
| <i>Irrlicht</i> <sup>6</sup>                  | <a href="http://irrlicht.sourceforge.net/">http://irrlicht.sourceforge.net/</a> | 2D/3D game engine developed by a small independent developer team; written in C++; using D3D, OpenGL; enables real-time rendering and external input devices                                                             |
| <i>Unity 3D Engine</i> <sup>10</sup>          | <a href="http://unity3d.com/">http://unity3d.com/</a>                           | Advanced 2D/3D and VR development platform written in C#, JavaScript or Boo; included in <i>Unity 3D Personal Edition</i> ; supports real-time rendering and external input devices; game development for mobile devices |
| <b>Design and animation of VR</b>             |                                                                                 |                                                                                                                                                                                                                          |
| <i>Unity 3D Engine</i>                        | <a href="http://unity3d.com/">http://unity3d.com/</a>                           | Advanced 2D/3D and development platform for VR (head mounting devices)                                                                                                                                                   |

|                                      |                                                                         |                                                                                                                                                                                                          |
|--------------------------------------|-------------------------------------------------------------------------|----------------------------------------------------------------------------------------------------------------------------------------------------------------------------------------------------------|
|                                      |                                                                         | included in <i>Unity 3D Personal Edition</i> (see above).                                                                                                                                                |
| WorldViz <sup>7</sup>                | <a href="http://www.worldviz.com/">http://www.worldviz.com/</a>         | Professional distributor for VR software and entire VR setup solutions                                                                                                                                   |
| <i>FreemooVR</i> <sup>11</sup>       | <a href="https://github.com/freemoovr">https://github.com/freemoovr</a> | Open-source VR software for freely moving animals                                                                                                                                                        |
| <b>Tracking software</b>             |                                                                         |                                                                                                                                                                                                          |
| BIOBSERVE <sup>12</sup>              | <a href="http://www.biobserve.com/">http://www.biobserve.com/</a>       | Company that develops software and hardware for behavioral experiments including tracking, recording and analyzing of behavior and path tracking in 2D and 3D                                            |
| EthoVision XT (Noldus) <sup>13</sup> | <a href="http://www.noldus.com/">http://www.noldus.com/</a>             | Software for automated video tracking (2D) and behavior analysis software specifically designed for animal behavior research; Track3D add-on available for 3D tracking; <i>free 30-day trial version</i> |

<sup>1</sup>Tedore and Johnsen (2015); <sup>2</sup>Baldauf et al., (2011); <sup>3</sup>Fischer et al., (2014); <sup>4</sup>Makowicz et al., (2016); <sup>5</sup>Culumber and Rosenthal (2013); <sup>6</sup>Müller et al., (2017); <sup>7</sup>Thurley et al., (2014); <sup>8</sup>Woo (2007); <sup>9</sup>Ingley et al., (2015); <sup>10</sup>Peckmezian and Taylor (2015); <sup>11</sup>Stowers et al. (2014); <sup>12</sup>Butkowski et al., (2011); <sup>13</sup>Fry et al., (2008).

**Table S3:** List of useful online expert-written resources concerning the issue of latency with VR.

|                                                                                                                                                                                                                                                                                                                                                                                       |
|---------------------------------------------------------------------------------------------------------------------------------------------------------------------------------------------------------------------------------------------------------------------------------------------------------------------------------------------------------------------------------------|
| <b>The John Carmack Blog</b> (well-known American game developer)                                                                                                                                                                                                                                                                                                                     |
| <ul style="list-style-type: none"><li>• <a href="http://oculusrift-blog.com/john-carmacks-message-of-latency/682/">http://oculusrift-blog.com/john-carmacks-message-of-latency/682/</a></li><li>• <a href="https://www.twentymillisecons.com/post/latency-mitigation-strategies/">https://www.twentymillisecons.com/post/latency-mitigation-strategies/</a></li></ul>                 |
| <b>Oculus and Valve Blogs</b> (prominent VR and game development studios)                                                                                                                                                                                                                                                                                                             |
| <ul style="list-style-type: none"><li>• <a href="http://blogs.valvesoftware.com/abrash/latency-the-sine-qua-non-of-ar-and-vr/">http://blogs.valvesoftware.com/abrash/latency-the-sine-qua-non-of-ar-and-vr/</a></li><li>• <a href="https://developer.oculus.com/blog/the-latent-power-of-prediction/">https://developer.oculus.com/blog/the-latent-power-of-prediction/</a></li></ul> |
| <b>Gizmodo</b>                                                                                                                                                                                                                                                                                                                                                                        |
| <ul style="list-style-type: none"><li>• <a href="http://gizmodo.com/the-neuroscience-of-why-vr-still-sucks-1691909123">http://gizmodo.com/the-neuroscience-of-why-vr-still-sucks-1691909123</a></li></ul>                                                                                                                                                                             |

**Box S1.** Software example for design and animation of 3D fish stimuli for biologists.

|                                                                                                                                                                                                                                                                                                                                                                                                                                                                                                                                                                                                                                                                                                                                                                                                                                                                                                                                                                                                                                                                                                                                                                                                                                                                                                                                           |
|-------------------------------------------------------------------------------------------------------------------------------------------------------------------------------------------------------------------------------------------------------------------------------------------------------------------------------------------------------------------------------------------------------------------------------------------------------------------------------------------------------------------------------------------------------------------------------------------------------------------------------------------------------------------------------------------------------------------------------------------------------------------------------------------------------------------------------------------------------------------------------------------------------------------------------------------------------------------------------------------------------------------------------------------------------------------------------------------------------------------------------------------------------------------------------------------------------------------------------------------------------------------------------------------------------------------------------------------|
| <b><i>anyFish 2.0</i></b>                                                                                                                                                                                                                                                                                                                                                                                                                                                                                                                                                                                                                                                                                                                                                                                                                                                                                                                                                                                                                                                                                                                                                                                                                                                                                                                 |
| <p>One obstacle to using animations in behavioral research is the difficulty and financial cost often associated with using advanced animation software programs (e.g. Maya). Recently, efforts have been made to create a free, open-source, user-friendly software platform for generating animations of fish for behavioral research (Veen et al., 2013; Ingleby et al., 2015). ‘<i>anyFish</i>’ is the result of this effort, and provides a model for transparency, repeatability, and collaboration in the field of animal behavior. <i>anyFish</i> provides an excellent means to create high-quality fish stimuli for behavioral research, requires only basic computational equipment to rapidly and repeatedly create animations, and is completely free and open-source, facilitating user guided changes to improve or customize the program according to their needs.</p> <p>To create an animation, <i>anyFish</i> uses lateral images of fish as an input, and incorporates modern geometric morphometric methods to accurately model fish shape. Images are used to quantify body shape and provide a texture for the final 3D model. <i>anyFish</i> allows users to map fin and body textures independently, providing added flexibility in experimental design, e.g., the appearance of the fins can be manipulated</p> |



independently of the appearance of the body (Culumber and Rosenthal, 2013). The shape of the model can be manipulated easily by changing the position of digitized landmarks that are applied to lateral images of the fish. By doing so, the user can manipulate body and fin shape even beyond morphological variation found in nature. The shape of the model can also be determined by generating an average body shape of a subsample of fish, and different sets of fish could be used to create multiple stimuli and avoid pseudoreplication.

The *anyFish* platform allows users to create animations of behavioral sequences using three different approaches. First, users can create an animation de novo by keyframing the animated rig in the X, Y, and Z-axes. Second, users can use a rotoscoping technique, wherein the model is matched to a video of a behavioral sequence frame by frame. Finally, motion capture data from third-party tracking systems can be used to determine the animated fish's swimming path. A major benefit of the *anyFish* workflow is that project folders can easily be shared amongst collaborators or via online data repositories (e.g., Dryad). This increases the ease of collaboration and provides added transparency and repeatability. In summary, *anyFish* provides a unique, albeit not always user-friendly, approach to creating animations for behavioral studies for fish.

### Supplementary references

Abaid N, Spinello C, Laut J, Porfiri M, 2012. Zebrafish (*Danio rerio*) responds to images animated by mathematical models of animal grouping. *Behav. Brain Res.* 232: 406–410.

Amcoff M, Lindqvist C, Kolm N, 2013. Sensory exploitation and plasticity in female mate choice in the swordtail characin. *Anim. Behav.* 85: 891–898.

Baldauf SA, Kullmann H, Thünken T, et al., 2009. Computer animation as a tool to study preferences in the cichlid *Pelvicachromis taeniatus*. *J. Fish Biol.* 75: 738–46.

- Baldauf SA, Bakker TCM, Herder F, et al., 2010. Male mate choice scales female ornament allometry in a cichlid fish. *BMC Evol. Biol.* 10: 301.
- Baldauf SA, Bakker TCM, Kullmann H, Thünken T, 2011. Female nuptial coloration and its adaptive significance in a mutual mate choice system. *Behav. Ecol.* 22: 478–485.
- Butkowski T, Yan W, Gray AM, et al., 2011. Automated interactive video playback for studies of animal communication. *J. Vis. Exp.* 48.
- Calabrese GM, Brady PC, Gruev V, Cummings ME, 2014. Polarization signaling in swordtails alters female mate preference. *Proc. Natl. Acad. Sci.* 111: 13397–13402.
- Campbell MW, Carter JD, Proctor D, et al., 2009. Computer animations stimulate contagious yawning in chimpanzees. *Proc. R. Soc. B* 276: 4255–4259.
- Clark DL, Stephenson KR, 1999. Response to video and computer-animated images by the tiger barb. *Environ. Biol. Fishes* 56: 317–324.
- Culumber ZW, Rosenthal GG, 2013. Mating preferences do not maintain the tailspot polymorphism in the platyfish, *Xiphophorus variatus*. *Behav. Ecol.* 24: 1286–1291.
- Dolins FL, Klimowicz C, Kelley J, Menzel CR, 2014. Using virtual reality to investigate comparative spatial cognitive abilities in chimpanzees and humans. *Am. J. Primatol.* 76: 496–513.
- Egger B, Klaeffer Y, Theis A, Salzburger W, 2011. A sensory bias has triggered the evolution of egg-spots in cichlid fishes. *PLoS One* 6: e25601.
- Fischer S, Taborsky B, Burlaud R, et al., 2014. Animated images as a tool to study visual communication: a case study in a cooperatively breeding cichlid. *Behaviour* 151: 1921–1942.
- Fry SN, Rohrseitz N, Straw AD, Dickinson MH, 2008. TrackFly: Virtual reality for a behavioral system analysis in free-flying fruit flies. *J. Neurosci. Methods* 171: 110–117.

- Gerlai R, Fernandes Y, Pereira T, 2009. Zebrafish (*Danio rerio*) responds to the animated image of a predator: Towards the development of an automated aversive task. *Behav. Brain Res.* 201: 318–324.
- Gray JR, Pawlowski V, Willis MA, 2002. A method for recording behavior and multineuronal CNS activity from tethered insects flying in virtual space. *J. Neurosci. Methods* 120: 211–223.
- Harland DP, Jackson RR, 2002. Influence of cues from the anterior medial eyes of virtual prey on *Portia fimbriata*, an araneophagic jumping spider. *J. Exp. Biol.* 205: 1861–1868.
- Hess S, Fischer S, Taborsky B, 2016. Territorial aggression reduces vigilance but increases aggression towards predators in a cooperatively breeding fish. *Anim. Behav.* 113: 229–235.
- Hiermes M, Rick IP, Mehlis M, Bakker TCM, 2016. The dynamics of color signals in male threespine sticklebacks *Gasterosteus aculeatus*. *Curr. Zool.* 62: 23–32.
- Hölscher C, Schnee A, Dahmen H, et al., 2005. Rats are able to navigate in virtual environments. *J. Exp. Biol.* 208: 561–569.
- Ingleby SJ, Rahmani Asl M, Wu C, et al., 2015. anyFish 2.0: An open-source software platform to generate and share animated fish models to study behavior. *SoftwareX* 1–9.
- Ioannou CC, Guttal V, Couzin ID, 2012. Predatory fish select for coordinated collective motion in virtual prey. *Science* 337: 1212–1215.
- Künzler R, Bakker TCM, 1998. Computer Animations as a Tool in the Study of Mating Preferences. *Behaviour* 135: 1137–1159.
- Levy K, Lerner A, Shashar N, 2014. Mate choice and body pattern variations in the Crown Butterfly fish *Chaetodon paucifasciatus* (Chaetodontidae). *Biol. Open* 1: 1–7.
- Makowicz AM, Plath M, Schlupp I, 2010. Using video playback to study the effect of an audience on male mating behavior in the Sailfin molly (*Poecilia latipinna*). *Behav. Proc.* 85: 36–41.

- McKinnon JS, McPhail JD, 1996. Male aggression and colour in divergent populations of the threespine stickleback: experiments with animations. *Can. J. Zool.* 74: 1727–1733.
- Mazzi D, Künzler R, Bakker TCM, 2003. Female preference for symmetry in computer-animated three-spined sticklebacks, *Gasterosteus aculeatus*. *Behav. Ecol. Sociobiol.* 54: 156–161.
- Mehlis M, Bakker TCM, Frommen JG, 2008. Smells like sib spirit: kin recognition in three-spined sticklebacks (*Gasterosteus aculeatus*) is mediated by olfactory cues. *Anim. Cogn.* 11: 643–50.
- Moffat SD, Hampson E, Hatzipantelis M, 1998. Navigation in a “Virtual” Maze: Sex Differences and Correlation With Psychometric Measures of Spatial Ability in Humans. *Evol. Hum. Behav.* 19: 73–87.
- Morris MR, Nicoletto PF, Hesselman E, 2003. A polymorphism in female preference for a polymorphic male trait in the swordtail fish *Xiphophorus cortezi*. *Anim. Behav.* 65: 45–52.
- Nakayasu T, Watanabe E, 2014. Biological motion stimuli are attractive to medaka fish. *Anim. Cogn.* 17: 559–575.
- Neave N, McCarty K, Freynik J, et al., 2011. Male dance moves that catch a woman’s eye. *Biol. Lett.* 7: 221–224.
- Nelson XJ, Garnett DT, Evans CS, 2010. Receiver psychology and the design of the deceptive caudal luring signal of the death adder. *Anim. Behav.* 79: 555–561.
- Nelson XJ, Jackson RR, 2006. A predator from East Africa that chooses malaria vectors as preferred prey. *PLoS One* 1: e132.
- Ord TJ, Evans CS, 2002. Interactive video playback and opponent assessment in lizards. *Behav. Processes* 59: 55–65.
- Parr LA, Waller BM, Heintz M, 2008. Facial Expression Categorization by Chimpanzees Using Standardized Stimuli. *Emotion* 8: 216–231.

- Pather S, Gerlai R, 2009. Shuttle box learning in zebrafish (*Danio rerio*). Behav. Brain Res. 196: 323–327.
- Peckmezian T, Taylor PW, 2015. A virtual reality paradigm for the study of visually mediated behaviour and cognition in spiders and cognition in spiders. Anim. Behav. 107: 87–95.
- Peters RA, Evans CS, 2007. Active space of a movement-based signal: response to the Jacky dragon (*Amphibolurus muricatus*) display is sensitive to distance, but independent of orientation. J. Exp. Biol. 210: 395–402.
- Qin M, Wong A, Seguin D, Gerlai R, 2014. Induction of social behavior in zebrafish: live versus computer animated fish as stimuli. Zebrafish 11: 185–197.
- Reichert MS, Galante H, Höbel G, 2014. Female gray treefrogs, *Hyla versicolor*, are responsive to visual stimuli but unselective of stimulus characteristics. J. Exp. Biol. 217: 3254–3262.
- Robinson DM, Morris MR, 2010. Unraveling the complexities of variation in female mate preference for vertical bars in the swordtail, *Xiphophorus cortezi*. Behav. Ecol. Sociobiol. 64: 1537–1545.
- Rosenthal GG, Evans CS, 1998. Female preference for swords in *Xiphophorus helleri* reflects a bias for large apparent size. Proc. Natl. Acad. Sci. USA 95: 4431–4436.
- Rosenthal GG, Ryan MJ, 2005. Assortative preferences for stripes in danios. Anim. Behav. 70: 1063–1066.
- Roster NO, Clark DL, Gillingham JC, 1995. Prey Catching Behavior in Frogs and Toads Using Video-Simulated Prey. Copeia 2: 496–498.
- Stowers JR, Fuhrmann A, Hofbauer M, et al., 2014. Reverse Engineering Animal Vision with Virtual Reality and Genetics. Computer 47: 38–45.
- Tedore C, Johnsen S, 2013. Pheromones exert top-down effects on visual recognition in the jumping spider *Lyssomanes viridis*. J. Exp. Biol. 216: 1744–56.

- Tedore C, Johnsen S, 2015. Visual mutual assessment of size in male *Lyssomanes viridis* jumping spider contests. *Behav. Ecol.* 26: 510–518.
- Thurley K, Henke J, Hermann J, et al., 2014. Mongolian gerbils learn to navigate in complex virtual spaces. *Behav. Brain Res.* 266: 161–168.
- Thünken T, Bakker TCM, Baldauf SA, 2014. “Armpit effect” in an African cichlid fish: self-referent kin recognition in mating decisions of male *Pelvicachromis taeniatus*. *Behav. Ecol. Sociobiol.* 8: 99–104.
- Van Dyk DA, Evans CS, 2008. Opponent assessment in lizards: examining the effect of aggressive and submissive signals. *Behav. Ecol.* 19: 895–901.
- Veen T, Ingley SJ, Cui R, et al., 2013. anyFish: an open-source software to generate animated fish models for behavioural studies. *Evol. Ecol. Res.* 15: 361–375.
- Watanabe S, Troje NF, 2006. Towards a “virtual pigeon”: a new technique for investigating avian social perception. *Anim. Cogn.* 9: 271–9.
- Wong BBM, Rosenthal GG, 2006. Female Disdain for Swords in a Swordtail Fish. *Am. Nat.* 167: 136–140.
- Woo KL, 2007. Computer-generated animal model stimuli. *J. Vis. Exp.* 6: 243.
- Woo KL, Rieucau G, 2012. Aggressive Signal Design in the Jacky Dragon (*Amphibolurus muricatus*): Display Duration Affects Efficiency. *Ethology* 118: 157–168.
- Woo KL, Rieucau G, 2015. The importance of syntax in a dynamic visual signal: recognition of jacky dragon displays depends upon sequence. *Acta Ethol.* 18: 255–263.
- Zbinden M, Largiadèr CR, Bakker TCM, 2004. Body size of virtual rivals affects ejaculate size in sticklebacks. *Behav. Ecol.* 15: 137–140.
